# Supplementary material
Source: HighWire-hosted journal article supplement (https://bmjopen.bmj.com/content/6/5/e010314)

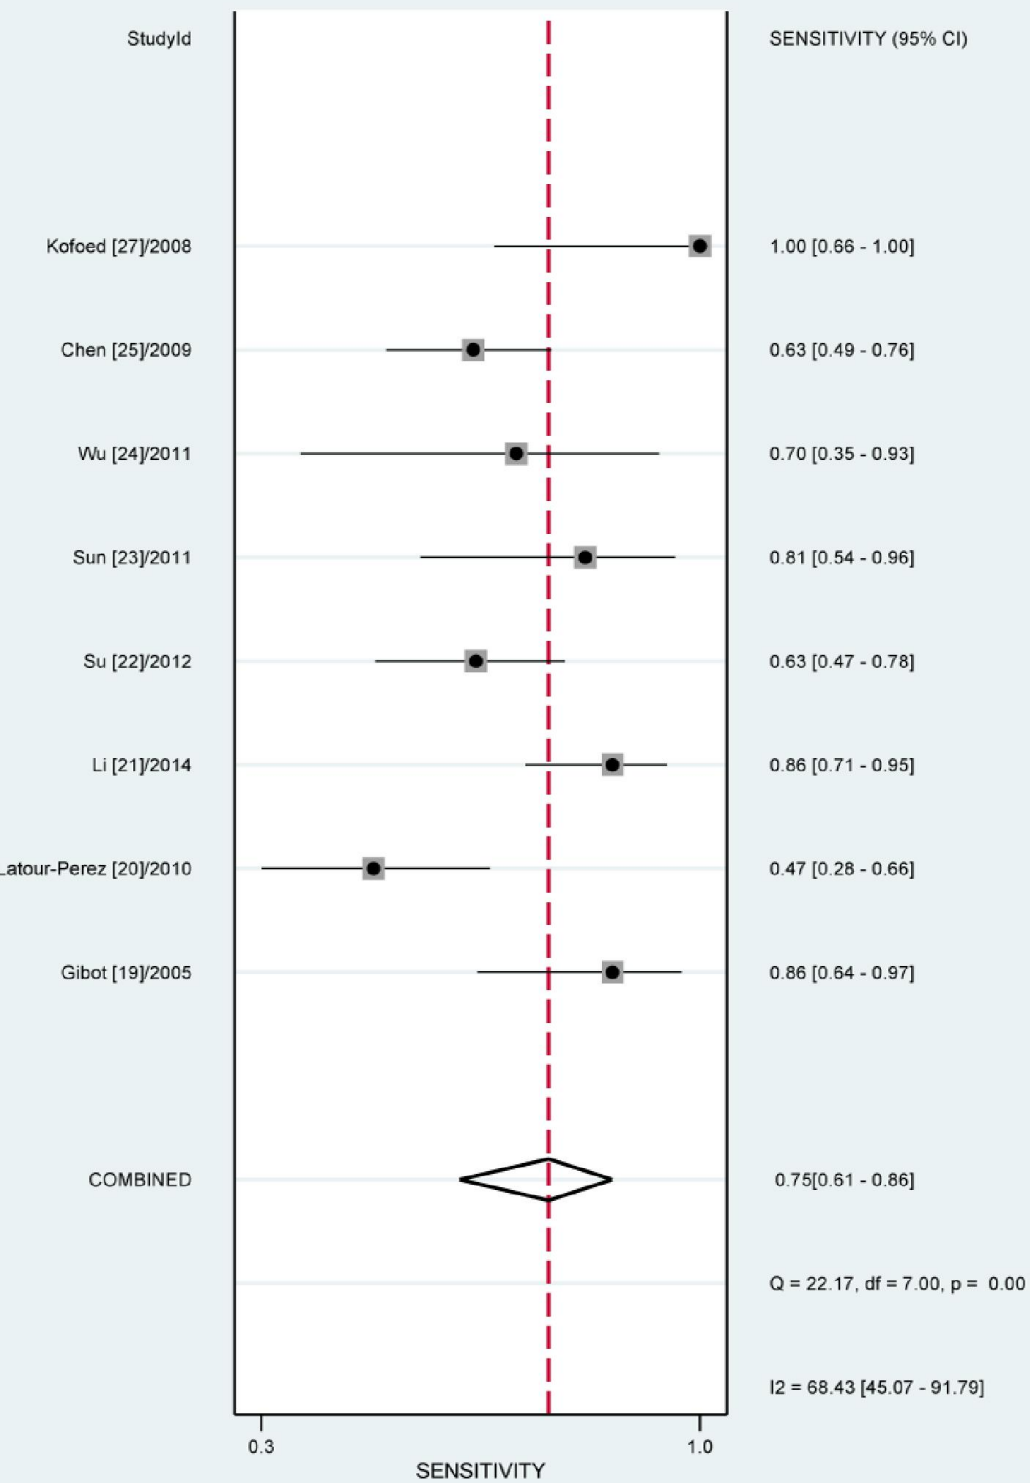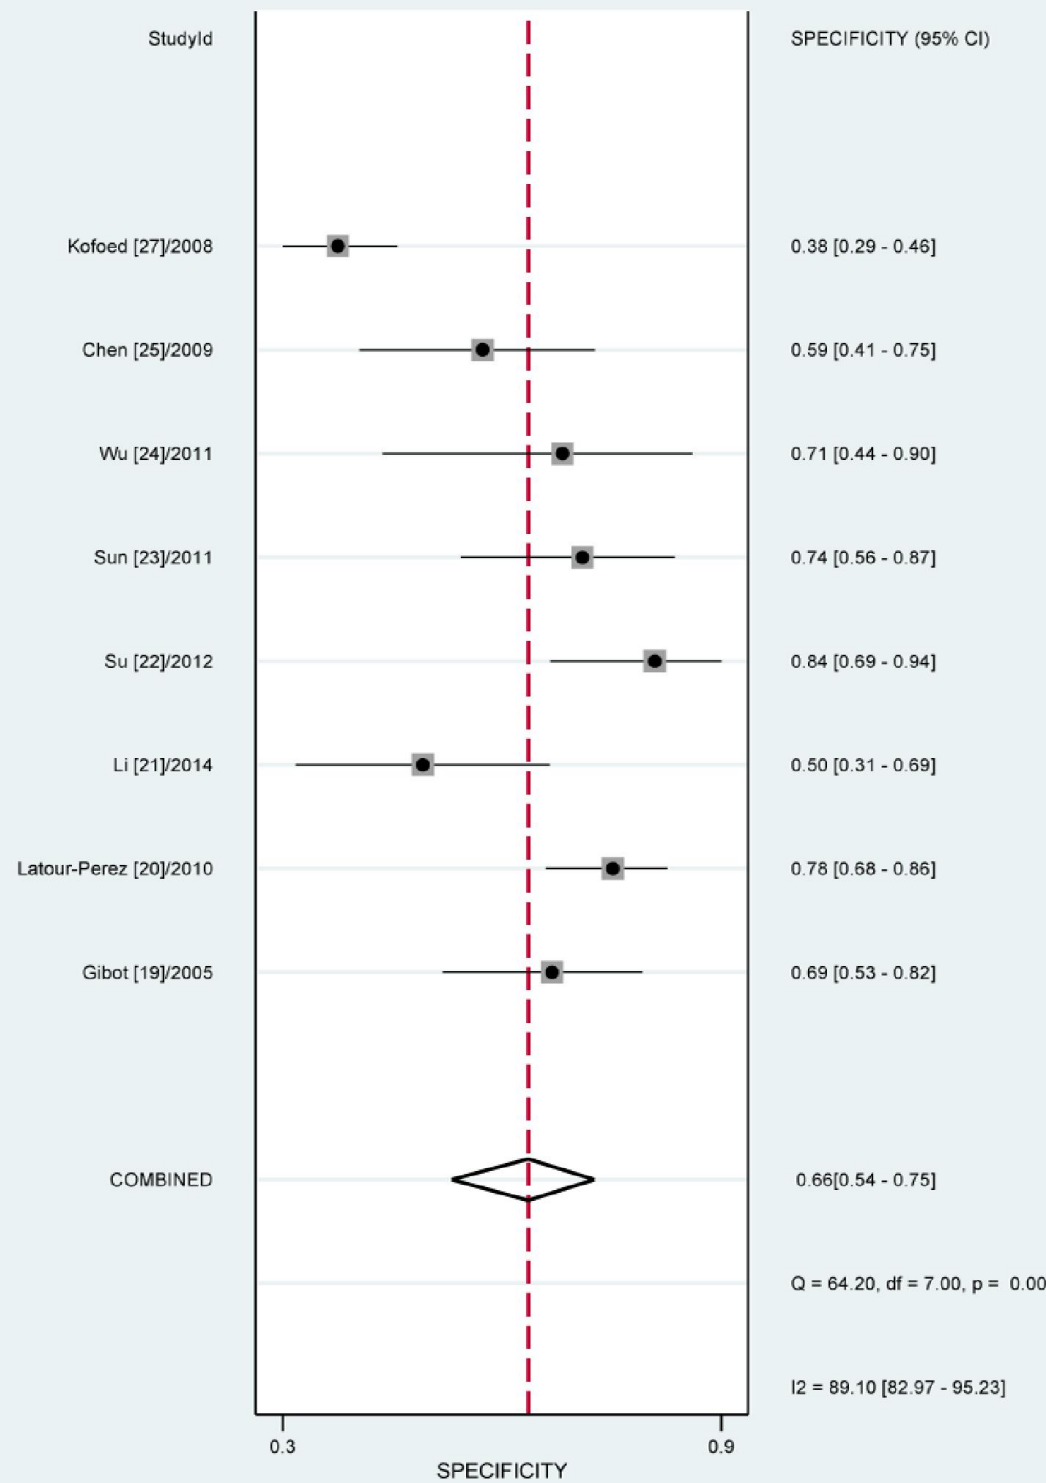

Supplement: inline-supplementary-material-3 [file inline-supplementary-material-3.pdf]

Meta-analysis estimates, given named study is omitted

| Lower CI Limit      ○ Estimate      | Upper CI Limit

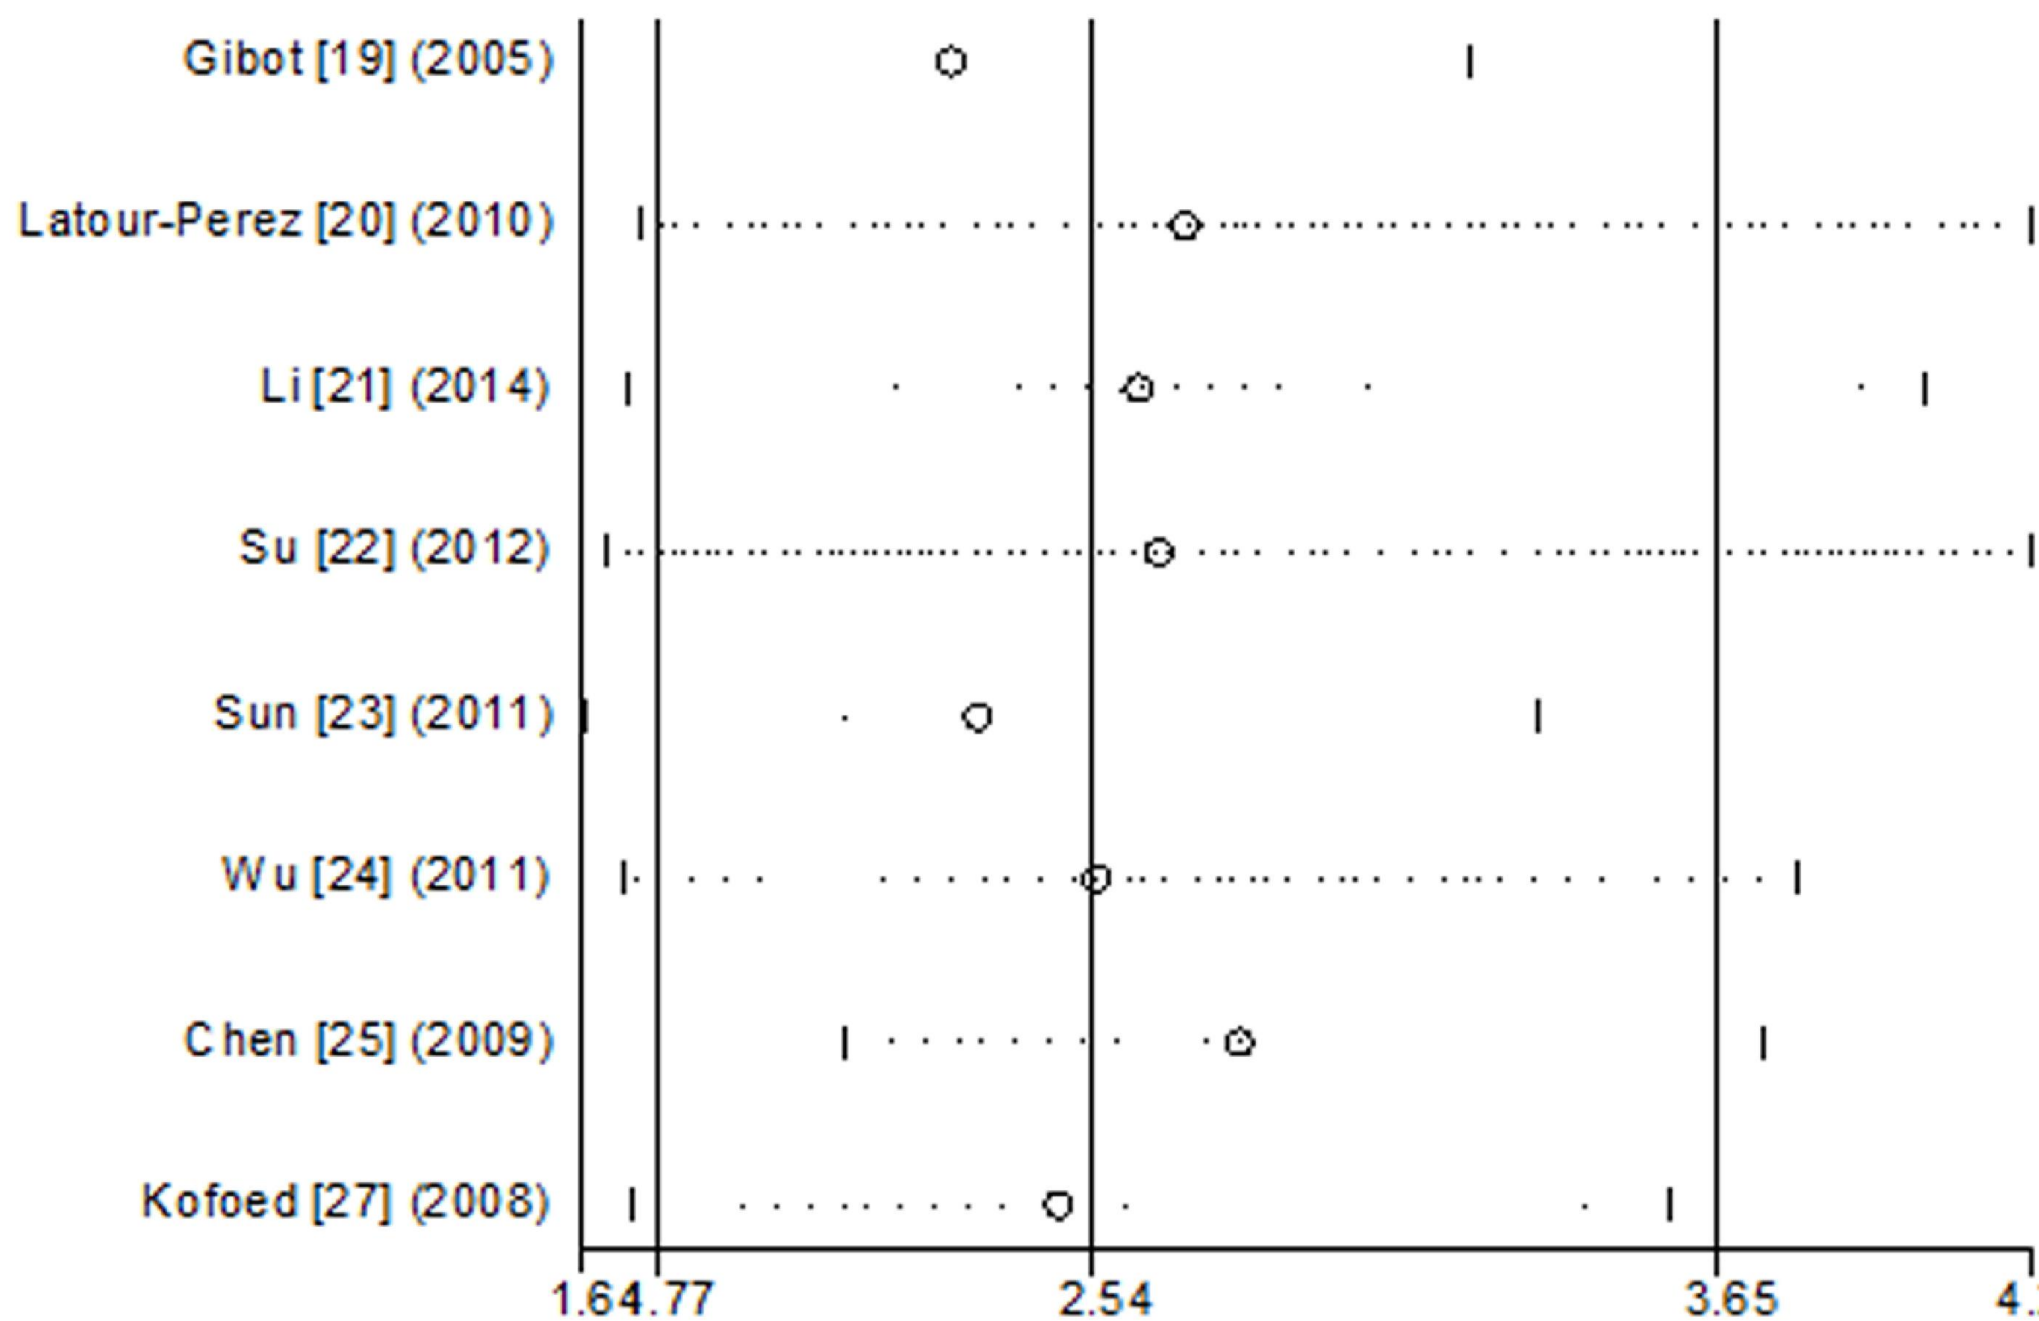

Supplement: inline-supplementary-material-4 [file inline-supplementary-material-4.pdf]
